# Supplementary material for: PERK/CHOP contributes to the CGK733-induced vesicular calcium sequestration which is accompanied by non-apoptotic cell death
Source: PubMed Central journal article supplement (PMC4694829; doi:10.18632/oncotarget.4487), 2015-07-10
Supplement: oncotarget-06-25252-s001.pdf [file oncotarget-06-25252-s001.pdf]

## SUPPLEMENTARY FIGURES

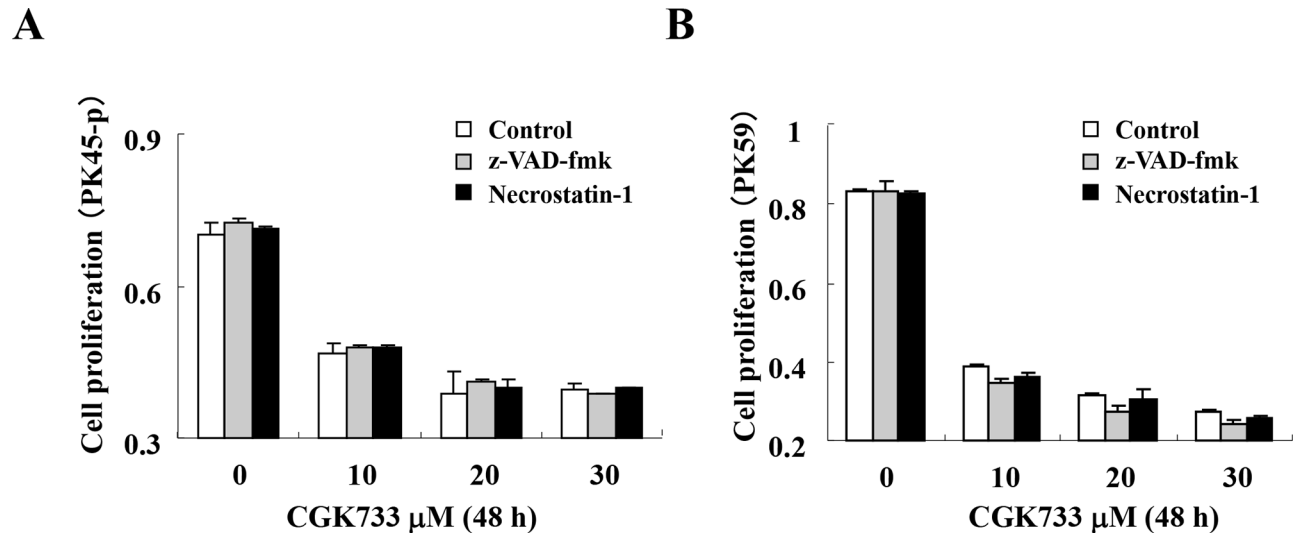

**Supplementary Figure S1: GK733-induced cell death is independent of apoptosis or necroptosis.** A. and B. PK45-p and PK59 cells were treated with CGK733 for 48 h in a dose dependent manner after cells were pre-treated with either 100  $\mu$ M of z-VAD-fmk or 50  $\mu$ M of Necrostatin-1.

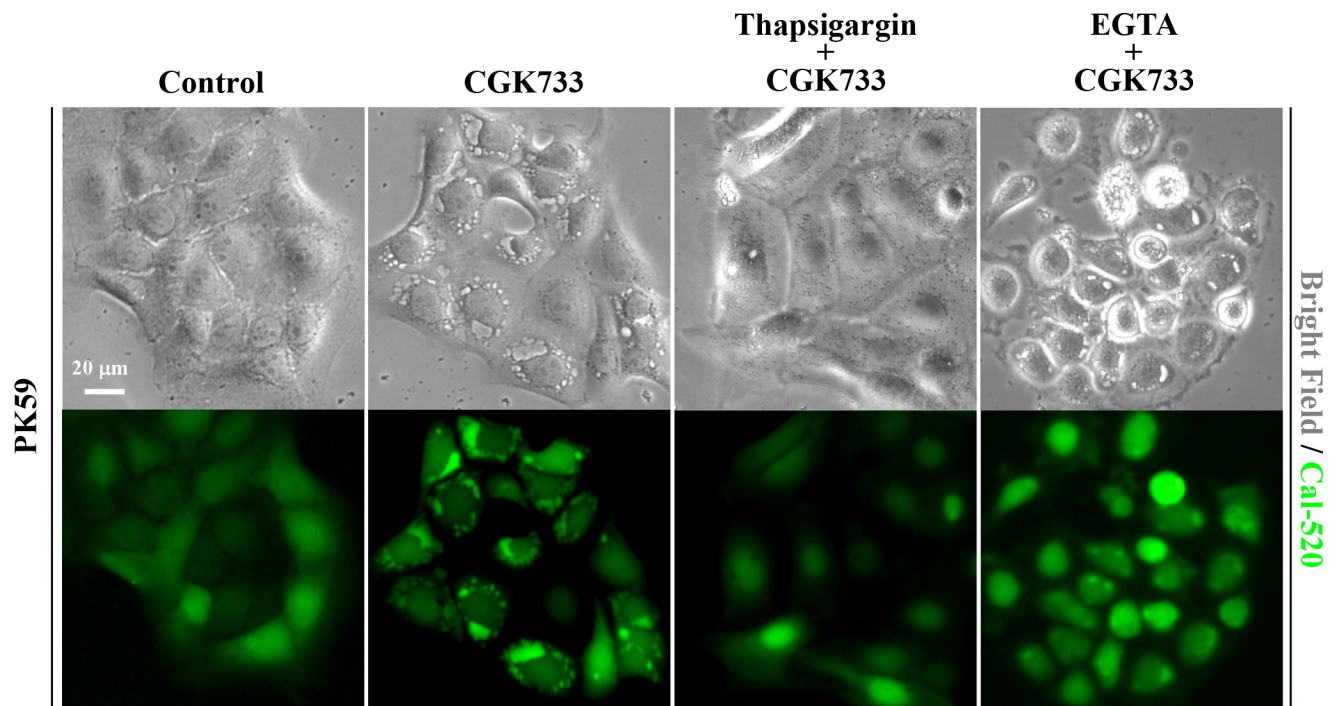

**Supplementary Figure S2: Thapsigargin inhibits CGK733-induced vesicular calcium sequestration in PK59 cells.** PK59 cells were treated with 20  $\mu$ M of CGK733 alone for 6 h or pre-treated with either 1  $\mu$ M of Thapsigargin or 10 mM of EGTA.
